# Supplementary material for: The severity of imiquimod-induced mouse skin inflammation is independent of endogenous IL-38 expression
Source: PubMed Central journal article supplement (PMC5858842; doi:10.1371/journal.pone.0194667), 2018-03-19

Figure S2

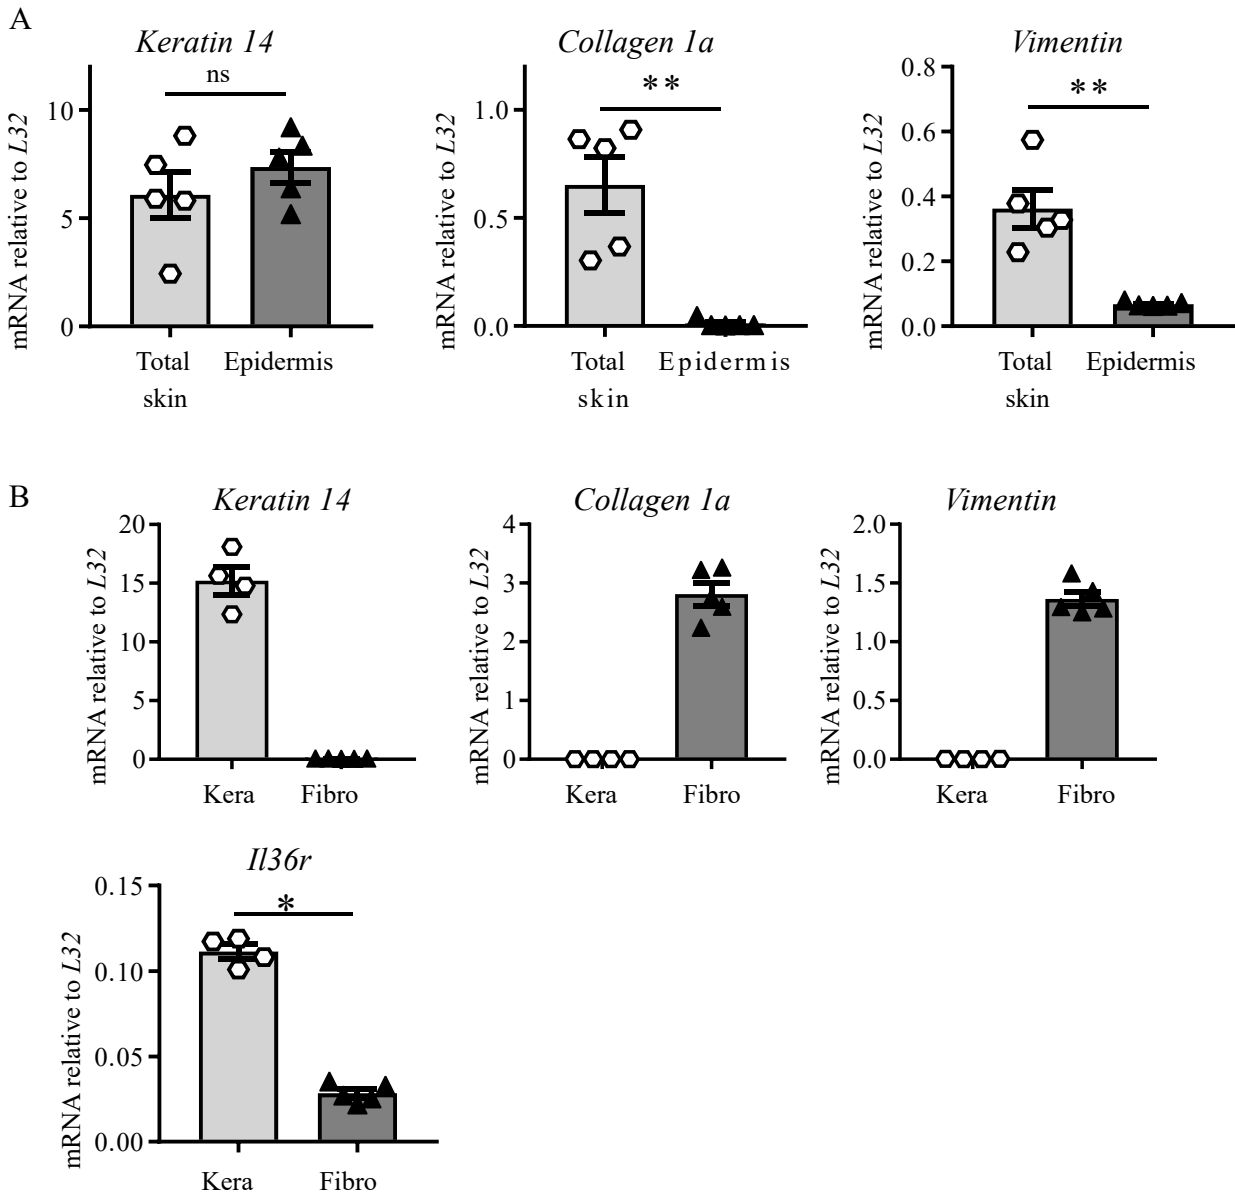

Supplement: pone.0194667.s002.pdf [file pone.0194667.s002.pdf]
