# Supplementary material for: The severity of imiquimod-induced mouse skin inflammation is independent of endogenous IL-38 expression
Source: PubMed Central journal article supplement (PMC5858842; doi:10.1371/journal.pone.0194667), 2018-03-19
Supplement: pone.0194667.s004.pdf [file pone.0194667.s004.pdf]

Figure S4

A HE

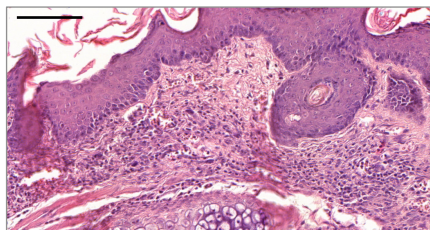

anti-Ly6G

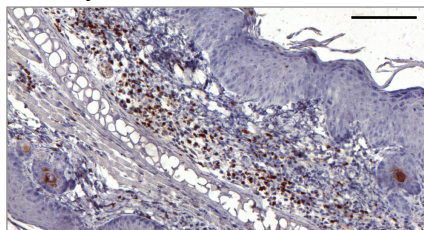

anti-CD3

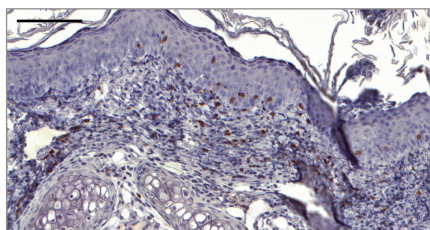

anti-B220

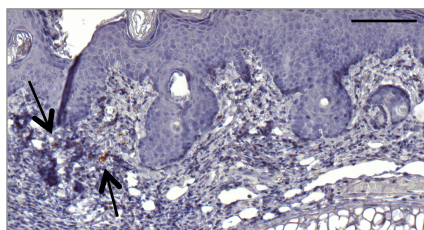

B anti-Ly6G

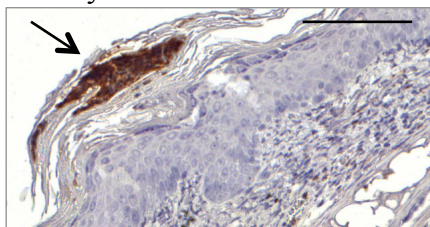

HE

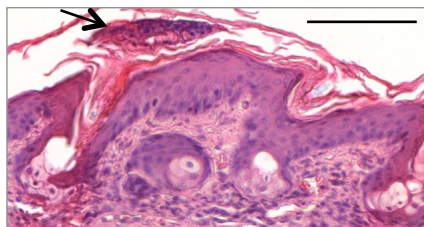

C anti-Ly6G

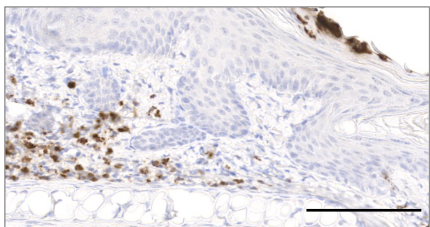

anti-CD3

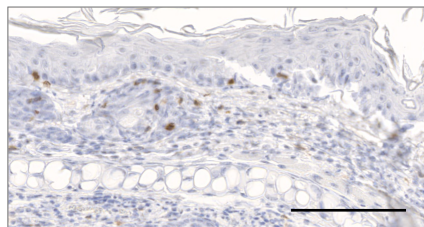

WT

anti-Ly6G

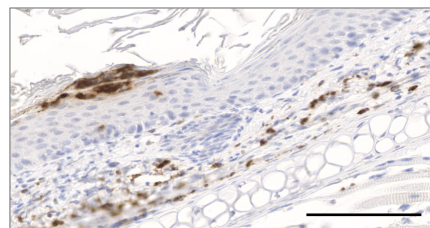

anti-CD3

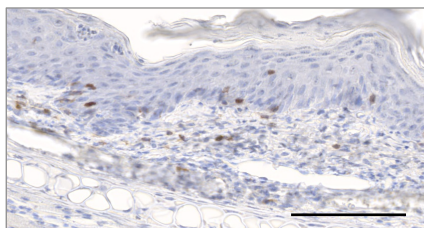

*Il-38*<sup>-/-</sup>
